# Supplementary material
Source: ML conference proceedings conference paper supplement (https://proceedings.mlr.press/v54/sasaki17a.html)
Supplement: Supplementary file [file sasaki17a-supp.pdf]

# Supplementary Material for “Estimating Density Ridges by Direct Estimation of Density-Derivative-Ratios”

**Hiroaki Sasaki**<sup>1,4</sup>  
hsasaki@is.naist.jp

**Takafumi Kanamori**<sup>2,4</sup>  
kanamori@is.nagoya-u.ac.jp

**Masashi Sugiyama**<sup>3,4</sup>  
sugi@k.u-tokyo.ac.jp

<sup>1</sup> Graduate School of Information Science, Nara Institute of Science and Technology, Nara, Japan

<sup>2</sup> Department of Computer Science and Mathematical Informatics, Nagoya University, Aichi, Japan

<sup>3</sup> Graduate School of Frontier Sciences, The University of Tokyo, Tokyo, Japan

<sup>4</sup> Center for Advanced Intelligence Project, RIKEN, Tokyo, Japan

## A Proof of Theorem 1

Let  $L(r)$  be the objective function of (9). Suppose that  $n$  is sufficiently large and  $\|r_{k,j}^*\|_{\mathcal{H}} \leq M_n$  holds. Then, the inequality  $L(\widehat{r}_{k,j}) \leq L(r_{k,j}^*)$  leads to

$$\begin{aligned} \frac{1}{2} \|\widehat{r} - r_{k,j}^*\|_P^2 &\leq \frac{1}{2} \int \{(\widehat{r})^2 - (r_{k,j}^*)^2\} d(P - P_n) \\ &\quad - (-1)^k \int \{\partial^{k,j} \widehat{r} - \partial^{k,j} r_{k,j}^*\} d(P - P_n), \end{aligned} \quad (1)$$

where we used the equality

$$\int (r_{k,j}^*)^2 dP = (-1)^k \int \partial^{k,j} r_{k,j}^* dP$$

that holds under the assumption of  $p(\mathbf{x})$ .

We use the following theorem.

**Theorem A** (Proposition 4 in Cucker and Smale [2002]). *Let  $\mathcal{F} \subset (C^\infty(\mathcal{D}), \|\cdot\|_\infty)$  be a function set defined on a compact set  $\mathcal{D}$  endowed with the supremum norm. Suppose that there exists  $B > 0$  such that  $\|f\|_\infty \leq B$  for any  $f \in \mathcal{F}$ . Let  $P_n$  be the empirical distribution of  $n$  i.i.d. samples from  $P$ . Then, for all  $\varepsilon > 0$*

$$\begin{aligned} &\Pr \left\{ \sup_{f \in \mathcal{F}} \left| \int f d(P - P_n) \right| > \varepsilon \right\} \\ &\leq 2\mathcal{N}_\infty(\mathcal{F}, \varepsilon/4) \exp \left( -\frac{n\varepsilon^2}{4(2\sigma^2 + B\varepsilon/3)} \right) \end{aligned}$$

holds, where  $\mathcal{N}_\infty(\mathcal{F}, \varepsilon)$  is the covering number of  $\mathcal{F}$  with the radius  $\varepsilon$  under the supremum norm and  $\sigma^2 := \sup_{f \in \mathcal{F}} \text{Var}[f] \leq B^2$ .

### A.1 Bounds of Covering Entropy

Suppose that  $M = M_n$  for a fixed sample size  $n$ . Let  $\mathcal{H}_M$  be  $\mathcal{H}_M = \{r \in \mathcal{H} \mid \|r\|_{\mathcal{H}} \leq M\}$ . We derive upper

bounds for the covering numbers of the function sets  $\mathcal{F}_M$  and  $\mathcal{G}_M$  defined as

$$\begin{aligned} \mathcal{F}_M &= \{r^2 - (r_{k,j}^*)^2 \mid r \in \mathcal{H}_M\} \\ \mathcal{G}_M &= \{\partial^{k,j} r - \partial^{k,j} r_{k,j}^* \mid r \in \mathcal{H}_M\}. \end{aligned}$$

The supremum norm is bounded above by the RKHS norm, i.e., we have

$$|r(\mathbf{x})| \leq \|r\|_{\mathcal{H}} \sqrt{K(\mathbf{x}, \mathbf{x})} \leq M c_K.$$

Firstly, let us consider  $\mathcal{F}_M$ . For any  $r^2 - (r_{k,j}^*)^2 \in \mathcal{F}_M$ , the supremum norm is bounded above by  $2M^2 c_K^2$ , since the inequality

$$\begin{aligned} \|r^2 - (r_{k,j}^*)^2\|_\infty &\leq \|r^2\|_\infty + \|(r_{k,j}^*)^2\|_\infty \\ &= \|r\|_\infty^2 + \|r_{k,j}^*\|_\infty^2 \\ &= 2M^2 c_K^2 \end{aligned}$$

holds. For  $r_1^2 - (r_{k,j}^*)^2, r_2^2 - (r_{k,j}^*)^2 \in \mathcal{F}_M$ , we have

$$\begin{aligned} &\|(r_1^2 - (r_{k,j}^*)^2) - (r_2^2 - (r_{k,j}^*)^2)\|_\infty \\ &= \sup_{\mathbf{x}} |r_1(\mathbf{x}) + r_2(\mathbf{x})| \cdot |r_1(\mathbf{x}) - r_2(\mathbf{x})| \\ &\leq 2M c_K \sup_{\mathbf{x}} |r_1(\mathbf{x}) - r_2(\mathbf{x})| \\ &= 2M c_K \|r_1 - r_2\|_\infty. \end{aligned}$$

Hence, an upper bound of the covering number of  $\mathcal{F}_M$  is given by

$$\ln \mathcal{N}_\infty(\mathcal{F}_M, 2M c_K \varepsilon) \leq \ln \mathcal{N}_\infty(\mathcal{H}_M, \varepsilon) \leq C \left( \frac{M}{\varepsilon} \right)^{2D/h}$$

for all  $h > D$ . The second inequality is presented in Cucker and Smale [2002], where  $C$  is a constant independent of  $M$  and  $\varepsilon$ . Hence, we have

$$\ln \mathcal{N}_\infty(\mathcal{F}_M, \varepsilon) \leq C \left( \frac{M^2}{\varepsilon} \right)^{2D/h}. \quad (2)$$

Secondly, let us consider  $\mathcal{G}_M$ . The assumption (10) ensures that

$$\begin{aligned} |\partial^{k,j} r(\mathbf{x}) - \partial^{k,j} r_{k,j}^*(\mathbf{x})| &= |\partial^{k,j} (r(\mathbf{x}) - r_{k,j}^*(\mathbf{x}))| \\ &\leq \|r - r_{k,j}^*\|_{\mathcal{H}} \sqrt{\partial^j \partial'^j K(\mathbf{x}, \mathbf{x})} \\ &\leq 2Mc_K \end{aligned}$$

holds for any  $\partial^{k,j} r - \partial^{k,j} r_{k,j}^* \in \mathcal{G}_M$ . The above inequality is shown in Zhou [2008]. In the same way we have

$$|\partial^{k',j'} r(\mathbf{x}) - \partial^{k',j'} r_{k',j'}^*(\mathbf{x})| \leq 2Mc_K$$

for all  $\mathbf{j}'$  such that  $k' = |\mathbf{j}'| \leq k + \ell$ . This means that  $\partial^{k,j} (r - r_{k,j}^*)$  is included in the Sobolev space  $(W^\ell, \|\cdot\|_\ell)$  endowed with the inner product

$$\int_{\mathcal{D}} \sum_{|\mathbf{j}'| \leq \ell} \partial^{k',j'} f(\mathbf{x}) \partial^{k',j'} g(\mathbf{x}) d\mathbf{x},$$

where  $d\mathbf{x}$  denotes the Lebesgue measure on the compact set  $\mathcal{D} \subset \mathbb{R}^D$ . The Sobolev norm of  $\partial^{k,j} (r - r_{k,j}^*)$  is bounded above by

$$\begin{aligned} \|\partial^{k,j} (r - r_{k,j}^*)\|_\ell^2 &= \sum_{\mathbf{j}': k \leq |\mathbf{j}'| \leq k+\ell} \int_{\mathcal{D}} |\partial^{k',j'} (r - r_{k,j}^*)|^2 d\mathbf{x} \\ &\leq 4\text{vol}(\mathcal{D}) c_K^2 M^2 \sum_{a=k}^{k+\ell} \binom{D-1+a}{D-1} \\ &\leq 12\text{vol}(\mathcal{D}) c_K^2 M^2 (D+k+\ell)^{k+\ell}, \end{aligned}$$

where  $\text{vol}(\mathcal{D})$  is the volume of  $\mathcal{D}$ . Hence,  $\|\partial^{k,j} r - \partial^{k,j} r_{k,j}^*\|_\ell \leq \sqrt{12\text{vol}(\mathcal{D})} c_K M (D+k+\ell)^{(k+\ell)/2}$  for all  $\partial^{k,j} r - \partial^{k,j} r_{k,j}^* \in \mathcal{G}_M$ . Let  $B_R$  be the ball in  $W^\ell$  with the radius  $R > 0$  centered as the origin. Then,  $\mathcal{G}_M$  is included in  $B_R$  with  $R = \sqrt{12\text{vol}(\mathcal{D})} c_K M (D+k+\ell)^{(k+\ell)/2}$  in  $W^\ell$ . Let  $I_\ell : W^\ell \rightarrow (C(\mathcal{D}), \|\cdot\|_\infty)$  be the embedding map. If  $\ell > D/2$  holds, the covering entropy of  $\overline{I_\ell(B_R)}$  is bounded above by

$$\ln \mathcal{N}_\infty(\overline{I_\ell(B_R)}, \varepsilon) \leq C(R/\varepsilon)^{D/\ell} + 1$$

as shown in Cucker and Smale [2002], where  $C$  is a constant independent of  $R$  and  $\varepsilon$ . Hence, the upper bound of the covering entropy of  $\mathcal{G}_M$  is given by

$$\ln \mathcal{N}(\mathcal{G}_M, \varepsilon) \leq C \left( \frac{M}{\varepsilon} \right)^{D/\ell} \quad (3)$$

for  $M \geq 1$ .

## A.2 Uniform Law of Large Numbers

Theorem A is used to derive an upper bound of  $\|\widehat{r}_{k,j} - r_{k,j}^*\|_P^2$  in (1). Both  $\mathcal{F}_M$  and  $\mathcal{G}_M$  satisfy the assumption

in Theorem A. Hence, (2) and (3) lead to

$$\begin{aligned} \sup_{r \in \mathcal{H}_M} \left| \int \{r^2 - (r_{k,j}^*)^2\} d(P - P_n) \right| &= O_p \left( \frac{M^{2D/(D+h)}}{n^{h/(2h+2D)}} \right), \quad h > D \\ \sup_{r \in \mathcal{H}_M} \left| \int \{\partial^{k,j} r - \partial^{k,j} (r_{k,j}^*)\} d(P - P_n) \right| &= O_p \left( \frac{M^{D/(2\ell+D)}}{n^{\ell/(2\ell+D)}} \right). \end{aligned}$$

Note that Theorem A holds even for any fixed sample size  $n$ . Suppose that  $M_n$  is of the poly-logarithmic order such as  $(\log(n))^\gamma$ . Then, for sufficiently large  $h (> D)$ , the upper bound of  $\|\widehat{r}_{k,j} - r_{k,j}^*\|_P^2$  is of the order  $c_n/n^{1/(2+D/\ell)}$  where  $c_n$  is of the poly-logarithmic order of  $n$ .

## References

- F. Cucker and S. Smale. On the mathematical foundations of learning. *Bulletin of the American Mathematical Society*, 39:1–49, 2002.
- D. Zhou. Derivative reproducing properties for kernel methods in learning theory. *Journal of Computational and Applied Mathematics*, 220(1-2):456–463, 2008.
